# Supplementary material for: The Redundancy of Peptidoglycan Carboxypeptidases Ensures Robust Cell Shape Maintenance in Escherichia coli
Source: PubMed Central journal article supplement (PMC4916385; doi:10.1128/mbio.00819-16), 2016-06-21
Supplement: mbo003162862sf1.pdf [file mbo003162862sf1.pdf]

**(A) pH 7.5 ... All strains / Pentapeptides**

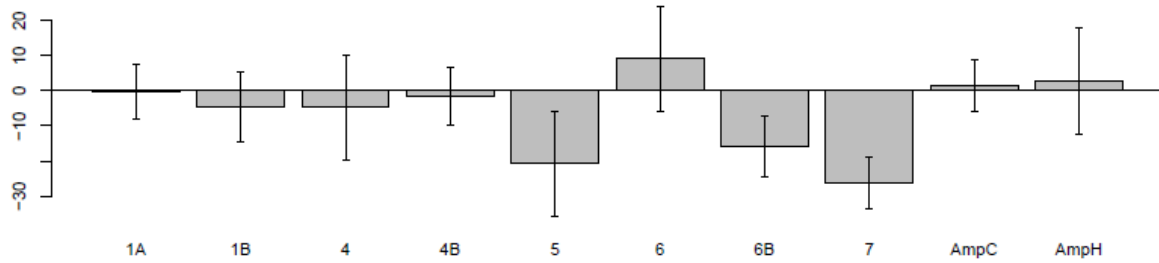

**(B) pH 7.5 ... All strains / Tetrapeptides**

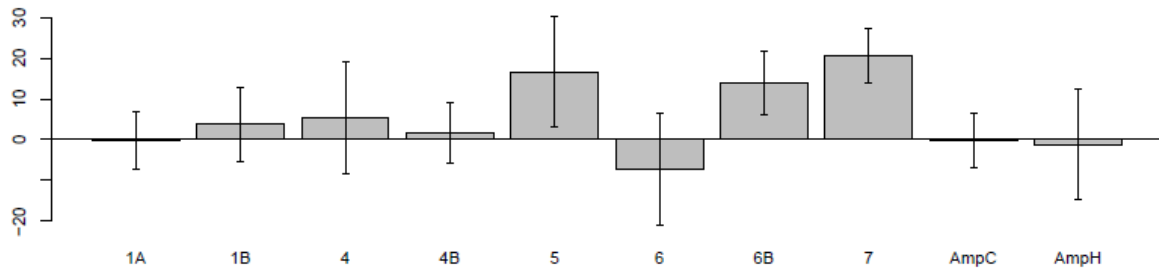

**(C) pH 5.0 ... All strains / Pentapeptides**

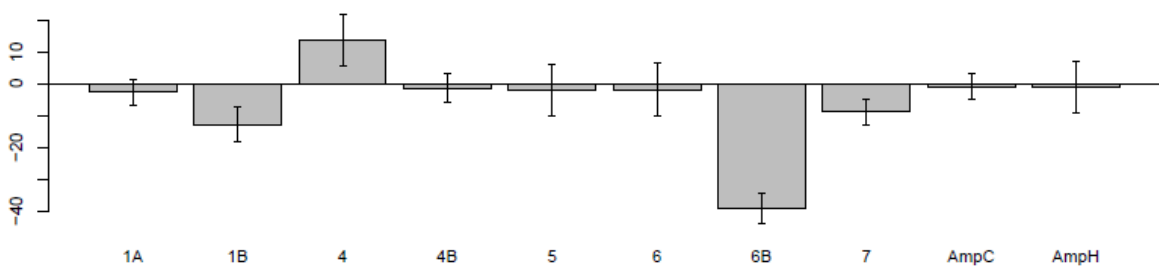

**(D) pH 5.0 ... All strains / Tetrapeptides**

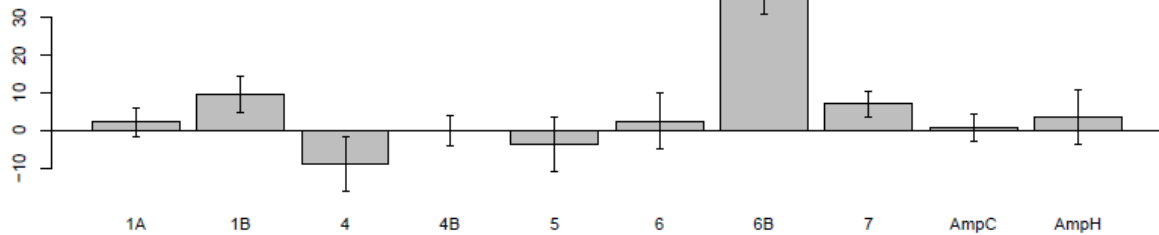

**Figure S1.** PBP-associated changes ( $\pm$  95% confidence intervals) in penta- and tetrapeptide-containing mucopeptides in all *E. coli* strains tested ( $n = 28$ ), including those with and without PBP5. Bacteria were grown in media buffered to pH 7.5 (A and B) or pH 5.0 (C and D), and mucopeptide compositions were determined by HPLC. The plotted values are the changes in mucopeptide levels associated with the presence of each PBP compared to absence of that PBP, and were computed using multivariable linear regression as described in Materials and Methods. DD-CPase activity decreases pentapeptides and increases tetrapeptides.
