# Supplementary material for: The Redundancy of Peptidoglycan Carboxypeptidases Ensures Robust Cell Shape Maintenance in Escherichia coli
Source: PubMed Central journal article supplement (PMC4916385; doi:10.1128/mbio.00819-16), 2016-06-21
Supplement: mbo003162862sf3.pdf [file mbo003162862sf3.pdf]

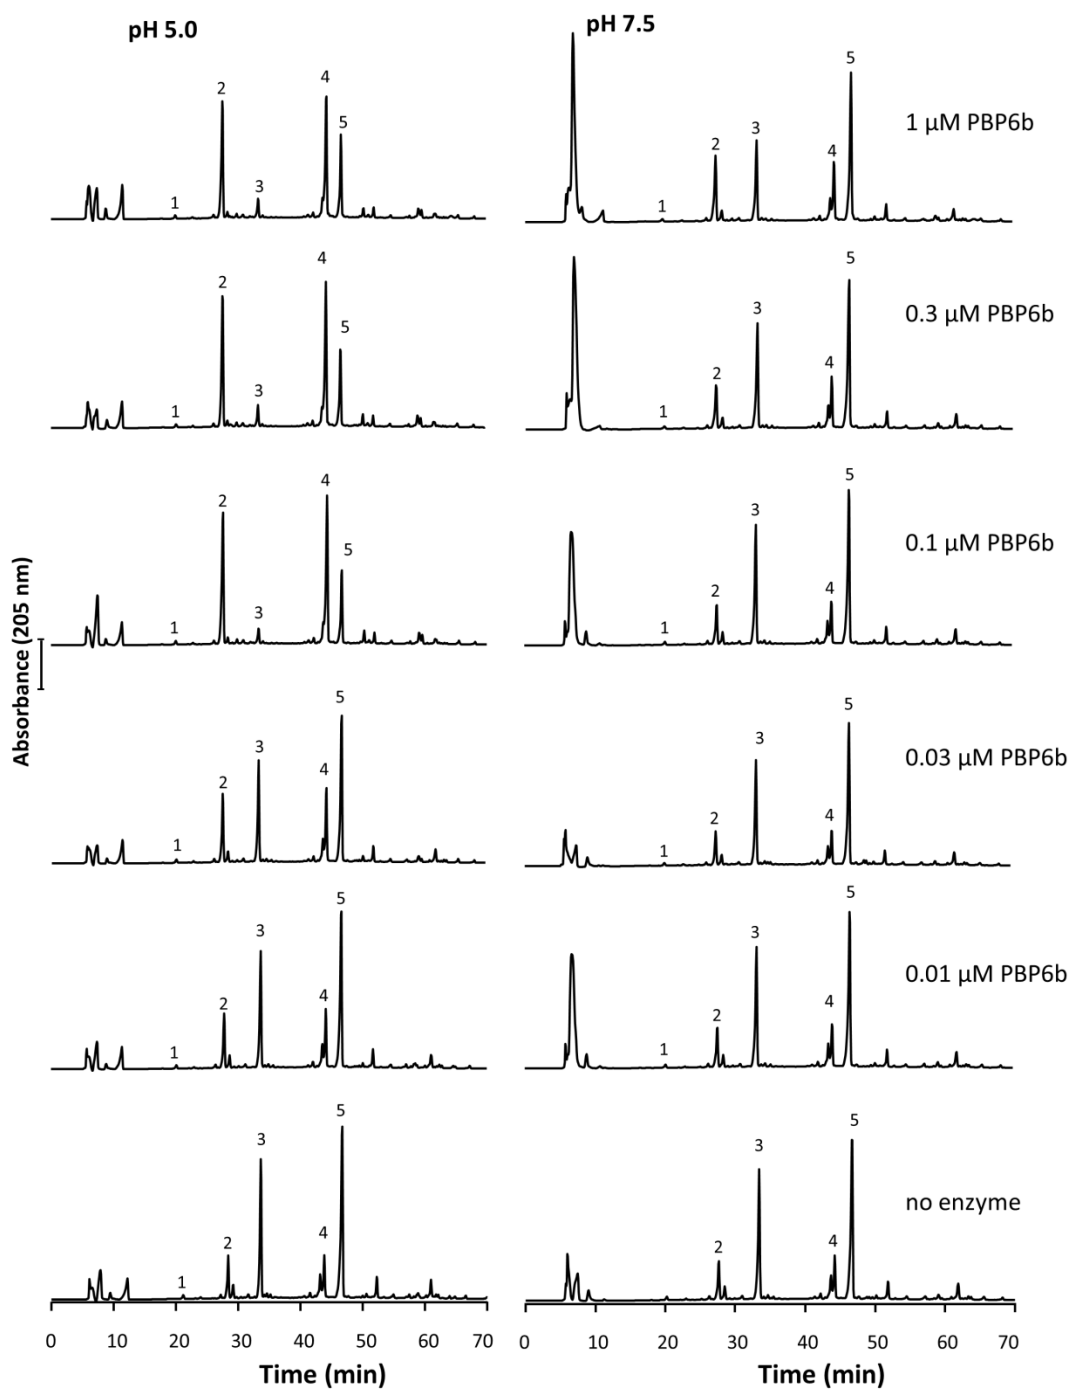

**Figure S3.** Activity of PBP6b against pentapeptide-rich PG at pH 5.0 and 7.5. PBP6b was incubated with pentapeptide-rich PG from *E. coli* CS703-1 at pH 5.0 or 7.5 at the concentration indicated, and the mucopeptide composition was analysed as described in Materials and Methods. Bar, 500 mAU. Mucopeptides are numbered as in Fig. 1, which also shows the structures. 1, Tri; 2, Tetra; 3, Penta; 4, TetraTetra; 5, TetraPenta.
