# Supplementary material for: The Redundancy of Peptidoglycan Carboxypeptidases Ensures Robust Cell Shape Maintenance in Escherichia coli
Source: PubMed Central journal article supplement (PMC4916385; doi:10.1128/mbio.00819-16), 2016-06-21
Supplement: mbo003162862sf4.pdf [file mbo003162862sf4.pdf]

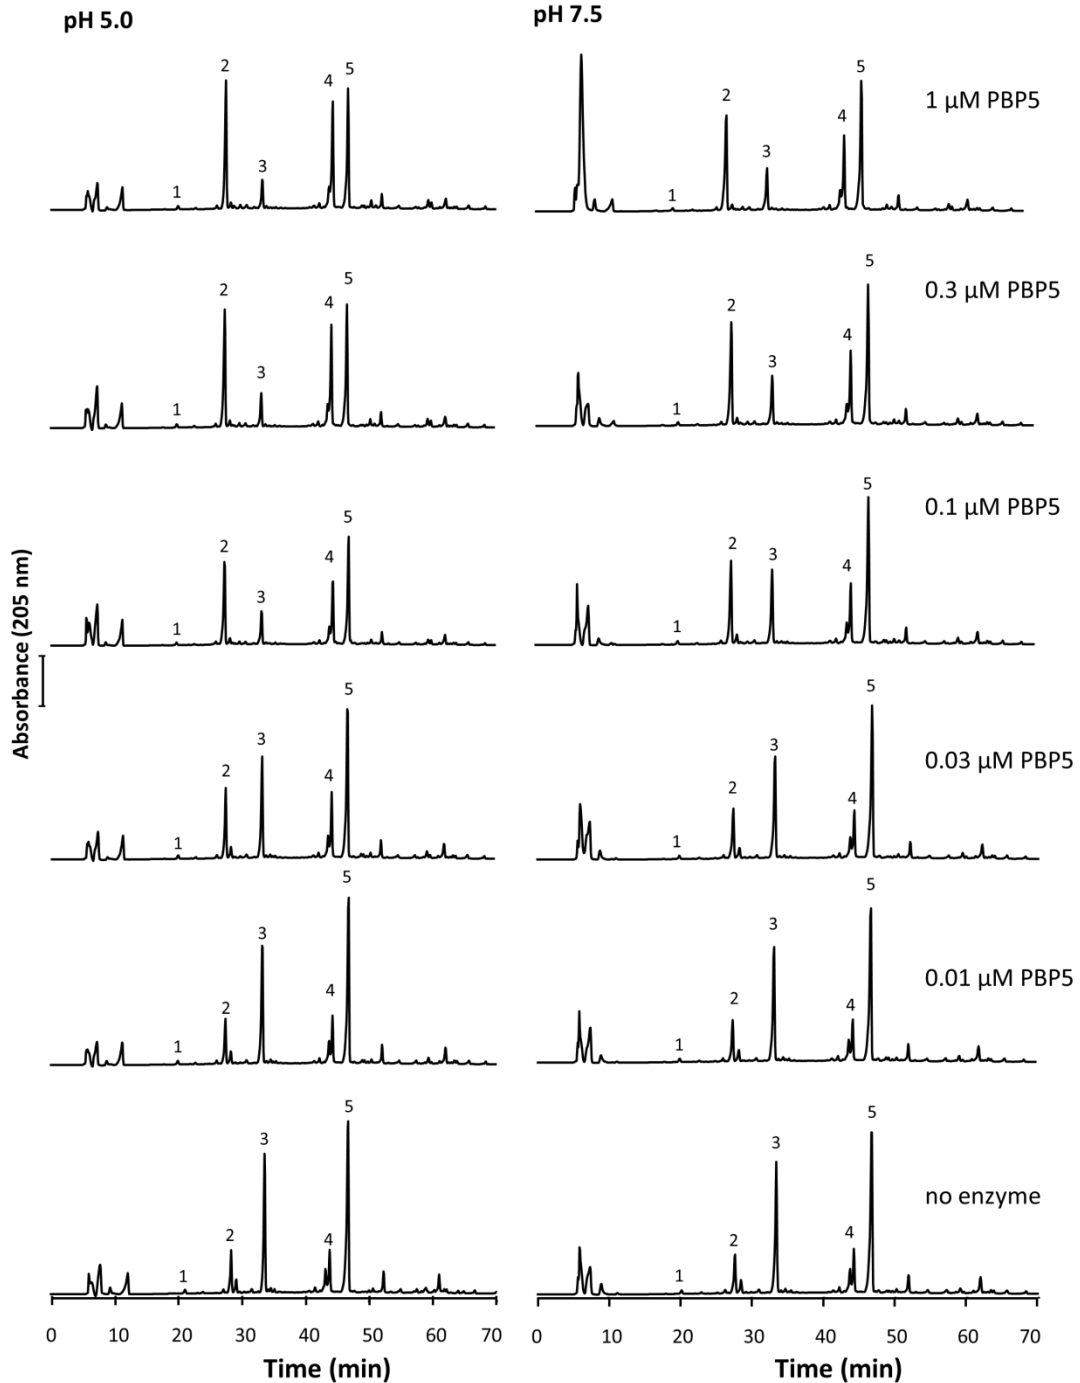

**Figure S4.** Activity of PBP5 against pentapeptide-rich PG at pH 5.0 and 7.5. PBP5 was incubated with pentapeptide-rich PG from *E. coli* CS703-1 at pH 5.0 or 7.5 at the concentration indicated, and the mucopeptide composition was analyzed as described in Materials and Methods. Bar, 500 mAU. Mucopeptides are numbered as in Fig. 1, which also shows the structures. 1, Tri; 2, Tetra; 3, Penta; 4, TetraTetra; 5, TetraPenta.
