# Supplementary material for: The Redundancy of Peptidoglycan Carboxypeptidases Ensures Robust Cell Shape Maintenance in Escherichia coli
Source: PubMed Central journal article supplement (PMC4916385; doi:10.1128/mbio.00819-16), 2016-06-21
Supplement: mbo003162862sf5.pdf [file mbo003162862sf5.pdf]

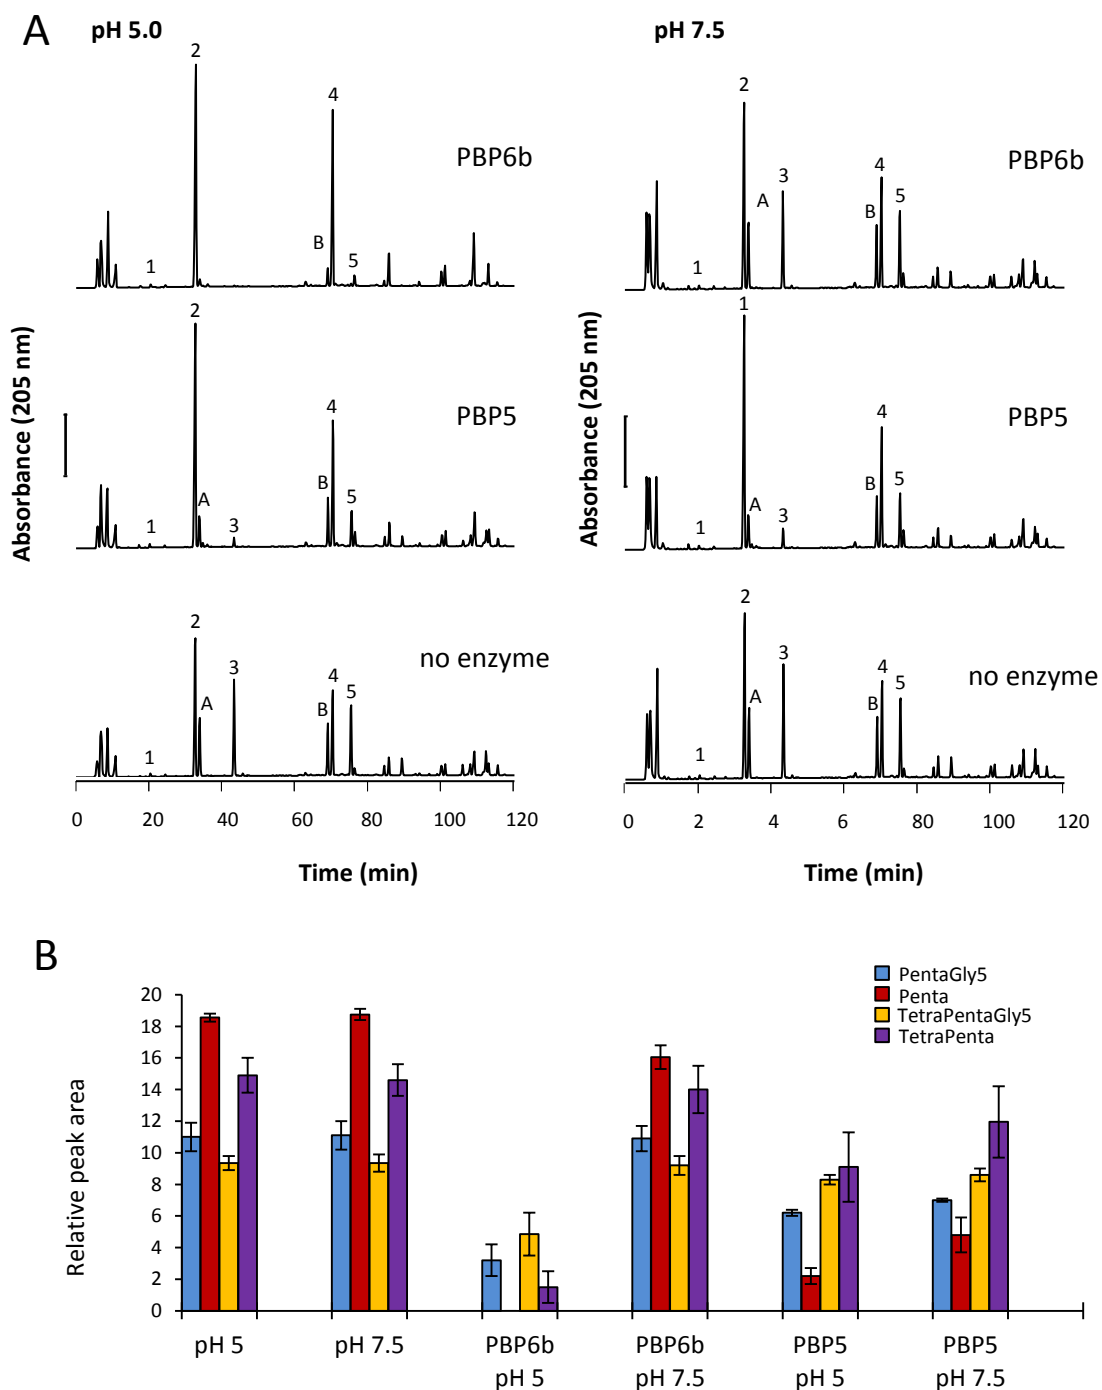

**Figure S5.** Activity of PBP6b and PBP5 against PG from *Caulobacter crescentus* at pH 5.0 and 7.5. **(A)** Pentapeptide-rich PG from *C. crescentus* was incubated with PBP6b (0.3  $\mu$ M) or PBP5 (0.3  $\mu$ M) at pH 5.0 or pH 7.5, and the muropeptide composition was analyzed by HPLC as described in Materials and Methods. Bar, 500 mAU. Muropeptides are numbered as in Fig. 1. Peaks A and B are the glycine containing muropeptides PentaGly5 and TetraPentaGly5, respectively. **(B)** Quantification of the major muropeptides from the HPLC profiles. The values are mean  $\pm$  variation of 2 independent experiments.
