# Supplementary material for: The Redundancy of Peptidoglycan Carboxypeptidases Ensures Robust Cell Shape Maintenance in Escherichia coli
Source: PubMed Central journal article supplement (PMC4916385; doi:10.1128/mbio.00819-16), 2016-06-21
Supplement: mbo003162862st2.pdf [file mbo003162862st2.pdf]

**Table S2.** Bacterial strains and plasmids.

| Strain / Plasmid            | Genotype / Reference                                                                                            |
|-----------------------------|-----------------------------------------------------------------------------------------------------------------|
| <b>Strains</b>              |                                                                                                                 |
| CS109                       | W1485 <i>rpoS(katF) rph</i>                                                                                     |
| CS204-1                     | CS109 <i>dacA::res pbpG::res</i>                                                                                |
| CS219-1                     | CS109 <i>dacA::res dacB::res</i>                                                                                |
| CS315-1                     | CS109 <i>dacA::res pbpG::res dacB::res</i>                                                                      |
| CS442-3                     | CS109 <i>dacC::res ampH::res dacA::res dacB::res</i>                                                            |
| CS617-1K                    | CS109 <i>mrcA::res ampC::res dacC::res pbpG::res ampH::res dacB::res-kan-res</i>                                |
| CS618-1K                    | CS109 <i>mrcA::res ampC::res dacC::res pbpG::res ampH::res dacA::res-kan-res</i>                                |
| CS619-1K                    | CS109 <i>mrcA::res ampC::res dacA::res dacB::res dacC::res ampH::res-kan-res</i>                                |
| CS806-1K                    | CS109 <i>ampC::res dacC::res pbpG::res ampH::res dacA::res dacB::res mrcA::res dacD::res-kan-res</i>            |
| SKCS66-1                    | CS109 <i>dacC::res ampH::res dacA::res dacB::res mrcB::res dacD::res pbp4b::ftr-kan-ftr</i>                     |
| SKCS67-1                    | CS109 <i>dacC::res ampH::res dacA::res dacB::res mrcA::res dacD::res pbp4b::ftr-kan-ftr</i>                     |
| SKCS68-1                    | CS109 <i>dacC::res ampH::res dacA::res dacB::res pbp4b::ftr-kan-ftr</i>                                         |
| SKCS69-1                    | CS109 <i>dacC::res ampH::res dacA::res dacB::res dacD::res-kan-res</i>                                          |
| SKCS72-1                    | CS109 <i>mrcA::res ampC::res dacC::res pbpG::res ampH::res dacA::res dacB::res pbp4b::ftr-kan-ftr</i>           |
| SKCS77-1                    | CS109 <i>ampC::res dacC::res pbpG::res ampH::res dacA::res dacB::res mrcA::res dacD::res pbp4b::res-kan-res</i> |
| SKCS78-1                    | CS109 <i>ampC::res dacC::res pbpG::res ampH::res dacA::res dacB::res pbp4b::ftr-kan-ftr</i>                     |
| SKCS80-1                    | CS109 <i>dacC::res ampH::res dacA::res dacB::res mrcA::res dacD::res pbp4b::ftr pbpG::res-kan-res</i>           |
| SKCS81-1                    | CS109 <i>dacC::res ampH::res dacA::res dacB::res mrcB::res dacD::res pbp4b::ftr pbpG::res-kan-res</i>           |
| SKCS82-1                    | CS109 <i>dacC::res ampH::res dacA::res dacB::res mrcB::res dacD::res pbp4b::ftr ampC::res-kan-res</i>           |
| SKCS87-1                    | CS109 <i>dacC::res ampH::res dacA::res dacB::res mrcB::res dacD::res pbp4b::ftr ampC::res pbpG::res-kan-res</i> |
| SKCS88-1                    | CS109 <i>dacC::res ampH::res dacA::res dacB::res dacD::res pbp4b::ftr pbpG::res-kan-res</i>                     |
| SKCS89-1                    | CS109 <i>dacC::res ampH::res dacA::res dacB::res dacD::res pbp4b::ftr ampC::res-kan-res</i>                     |
| SKCS97-1                    | CS109 <i>dacC::res ampH::res dacA::res dacB::res mrcA::res dacD::res pbp4b::ftr ampC::res-kan-res</i>           |
| SKCS99-1                    | CS109 <i>ampC::res dacC::res pbpG::res ampH::res dacA::res dacB::res mrcB::res dacD::res-kan-res</i>            |
| SKCS100-1                   | CS109 <i>dacC::res ampH::res dacA::res dacB::res dacD::res pbp4b::ftr ampC::res pbpG::res-kan-res</i>           |
| SKCS127-1                   | CS109 <i>dacA::res pbpG::res dacB::res dacD::res</i>                                                            |
| SKCS132-1                   | CS109 <i>dacA::res dacB::res dacD::res-kan-res</i>                                                              |
| SKCS133-1                   | CS109 <i>dacA::res pbpG::res dacD::res-kan-res</i>                                                              |
| SKCS138-1                   | CS109 <i>dacA-FLAG::ftr-kan-ftr</i>                                                                             |
| SKCS139-1                   | CS109 <i>dacD-FLAG::ftr-kan-ftr</i>                                                                             |
| SKCS140-1                   | CS109 <i>dacA::res pbpG::res dacB::res dacD-FLAG::ftr-kan-ftr</i>                                               |
| SKCS143-1                   | CS109 <i>dacD::sfgfp</i>                                                                                        |
| SKCS144-1                   | CS109 <i>dacA::res pbpG::res dacB::res dacD::sfgfp</i>                                                          |
| <b>Plasmids<sup>a</sup></b> |                                                                                                                 |
| pLP18-kan                   | P <sub>BAD</sub> vector (1)                                                                                     |
| pLP516                      | P <sub>BAD</sub> - <i>dacA</i> , kan (1)                                                                        |
| pLP517                      | P <sub>BAD</sub> - <i>dacA</i> <sup>(S44G)</sup> , kan (1)                                                      |
| pLP653                      | P <sub>BAD</sub> - <i>dacD</i> , kan (1)                                                                        |
| pLP655                      | P <sub>BAD</sub> - <i>dacD</i> <sup>(S63A)</sup> , kan (1)                                                      |
| pLPKC604                    | P <sub>BAD</sub> - <i>dacC</i> , kan (1)                                                                        |
| pLP606                      | P <sub>BAD</sub> - <i>dacC</i> <sup>(S66A)</sup> , kan (1)                                                      |
| pDACAhis                    | pET28a(+) derivative, for overexpression of His-PBP5 (2)                                                        |
| phisDACD                    | pET28a(+) derivative, that encodes PBP6b (1-366), this work                                                     |
| pET15bTEV                   | pET15b derivative, that encodes PBP6bΔC (1-353) for crystallographic studies, this work                         |

<sup>a</sup> References: (1) Potluri *et al.* (2012) *Mol Microbiol* **84**:203-224. (2) Potluri *et al.* (2010) *Mol Microbiol* **77**:300-323.
