# Supplementary material for: The Redundancy of Peptidoglycan Carboxypeptidases Ensures Robust Cell Shape Maintenance in Escherichia coli
Source: PubMed Central journal article supplement (PMC4916385; doi:10.1128/mbio.00819-16), 2016-06-21
Supplement: mbo003162862st3.pdf [file mbo003162862st3.pdf]

**Table S3.** Crystallographic parameters.

|                                      |                              |
|--------------------------------------|------------------------------|
| Space group                          | <i>P</i> 1                   |
| Unit-cell parameters                 |                              |
| <i>a</i> , <i>b</i> , <i>c</i> (Å)   | 35.25, 56.00, 108.14         |
| $\alpha$ , $\beta$ , $\gamma$ (°)    | 104.88, 95.24, 90.60         |
| Resolution <sup>a</sup> (Å)          | 43.59 – 2.40 (2.49 – 2.40)   |
| No. reflections recorded             | 56169 (5123)                 |
| Unique reflections                   | 29631 (2986)                 |
| Completeness (%)                     | 95.2 (91.2)                  |
| $\langle I/\sigma I \rangle$         | 5.1 (2.3)                    |
| Wilson B (Å <sup>2</sup> )           | 25.0                         |
| Redundancy                           | 1.9                          |
| Radiation source                     | Diamond Light Source (I02)   |
| Wavelength (Å)                       | 0.979030                     |
| No. of residues                      | Chain A: 318, Chain B: 317   |
| No. of waters                        | 171                          |
| $R_{merge}^b$ (%)                    | 9.2 (20.2)                   |
| $R_{work}^c$ (%)                     | 25.9                         |
| $R_{free}^d$ (%)                     | 30.2                         |
| Average B-factor (Å <sup>2</sup> )   |                              |
| Protein                              | Chain A: 35.7, Chain B: 36.5 |
| Waters                               | 30.4                         |
| Cruickshank DPI <sup>e</sup> (Å)     | 0.32                         |
| Ramachandran plot                    |                              |
| Most favoured (%)                    | 93.5                         |
| Additional allowed (%)               | 6.2                          |
| Outliers (%)                         | 0.3                          |
| R.m.s.d on ideal values <sup>f</sup> |                              |
| Bond lengths (Å)                     | 0.01                         |
| Bond angle (°)                       | 1.60                         |

<sup>a</sup> Values in parentheses refer to the highest resolution shell.

<sup>b</sup>  $R_{merge} = \sum_{hkl} \sum_i |I_i(hkl) - \langle I(hkl) \rangle| / \sum_{hkl} \sum_i I_i(hkl)$ ; where  $I_i(hkl)$  is the intensity of the *i*th measurement of reflection *hkl* and  $\langle I(hkl) \rangle$  is the mean value of  $I_i(hkl)$  for all *I* measurements.

<sup>c</sup>  $R_{work} = \sum_{hkl} ||F_o| - |F_c|| / \sum |F_o|$ , where  $F_o$  is the observed structure factor and  $F_c$  is the calculated structure factor.

<sup>d</sup>  $R_{free}$  is the same as  $R_{cryst}$  except calculated with a subset, 5%, of data that are excluded from refinement calculations.

<sup>e</sup> Diffraction precision index, Cruickshank *et al.* (1999) *Acta Crystallogr D Biol Crystallogr* **55**:583-601.

<sup>f</sup> Engh and Huber (1991) *Acta Crystallogr A Found Crystallogr* **47**:392-400.
